# Supplementary material
Source: publisher site journal article supplement (https://www.spandidos-publications.com/7327/downloadSupplementary)
Supplement: Supplementary file 1 [file downloadSupplementary]

## Sheet: Table S9
Table SIX. TC-associated genes in DEGs distinguished utilizing the Kaplan-Meier curves.
CLU
S100A13
NPC2
ZCCHC12
DHRS3
TNFRSF12A
AK1
CTSH
CLDN1
APOE
ANXA1
CD63
FLRT3
FRMD3
RAB34
ST3GAL5
DTX4
CANX
TUSC3
SNX22
MAP3K1
MRPL14
PLD3
CHD4
GOLGA4
PRR15
DYNC1LI2
RPS27L
SYNE2
PARP14
STRADB
CREB3L2
SCG5
CCND2
NINJ1
RAPH1
METTL7B
RXRG
C11orf49
FBN1
SIPA1L2
TRAT1
PYHIN1
SH3KBP1
TUBA4A
GZMM
CD247
FCGR3A
CD3G
GZMK
KLRB1
ARL4A
ASPH
FAM107B
MYADM
HACD4
ZNF331
NR3C1
NBEAL1
TCF4
ELOVL5
PSMB8
NR4A1
